# Supplementary material
Source: PubMed Central journal article supplement (PMC543994)
Supplement: molcellb_25_3_1025__1.pdf [file molcellb_25_3_1025__1.pdf]

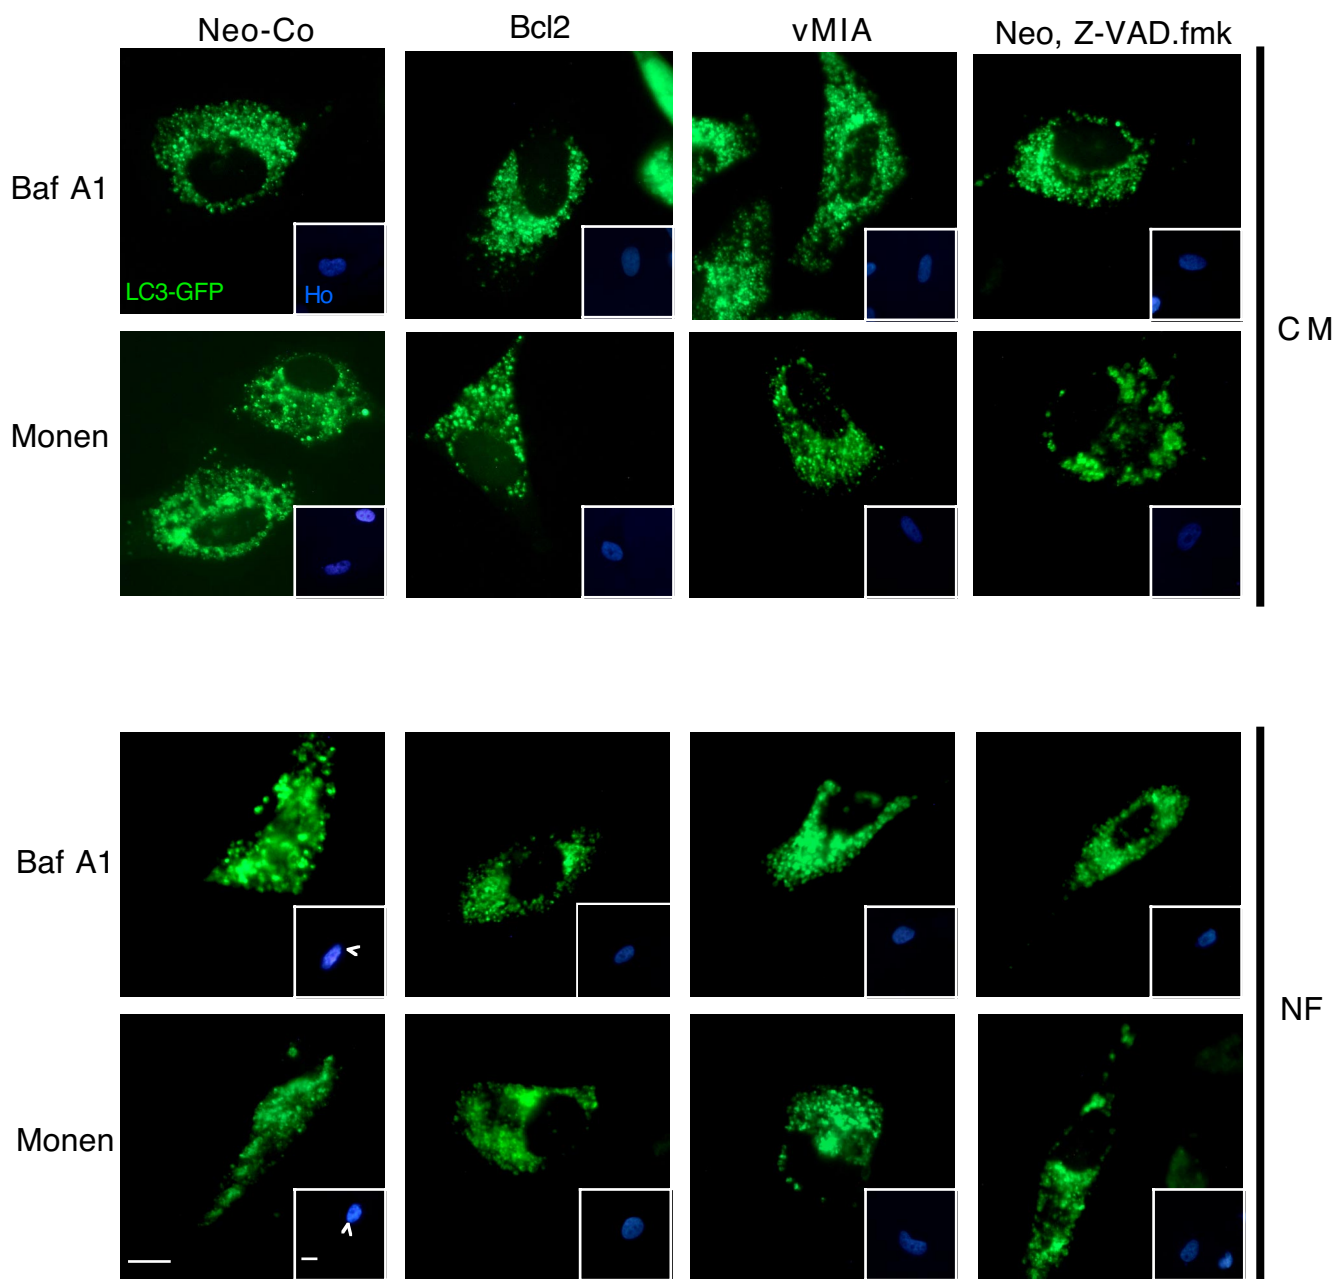

Fig. 1 Supplementary data

**Legend to supplementary Fig. 1:** HeLa cells stably transfected with vector only (Neo), with Bcl-2 or cytomegalovirus-derived vMIA were first transfected with LC3-GFP, 24 hours before the experiment, and then cultured in the indicated conditions (non-starved in CM, starved in NF), in the presence of the indicated autophagy inhibitors (bafilomycin A1 or monensin) as well as the caspase inhibitor Z-VAD.fmk (for Neo cells only) for 24 hours. Then, the cells were counterstained with Hoechst 33342 and fluorescence microscopy. Representative examples are shown and bars indicate 10  $\mu$ m. Note that this figure complements information contained in Fig. 6C.
