# Supplementary material
Source: PubMed Central journal article supplement (PMC543994)
Supplement: molcellb_25_3_1025__2.pdf [file molcellb_25_3_1025__2.pdf]

Baf A1

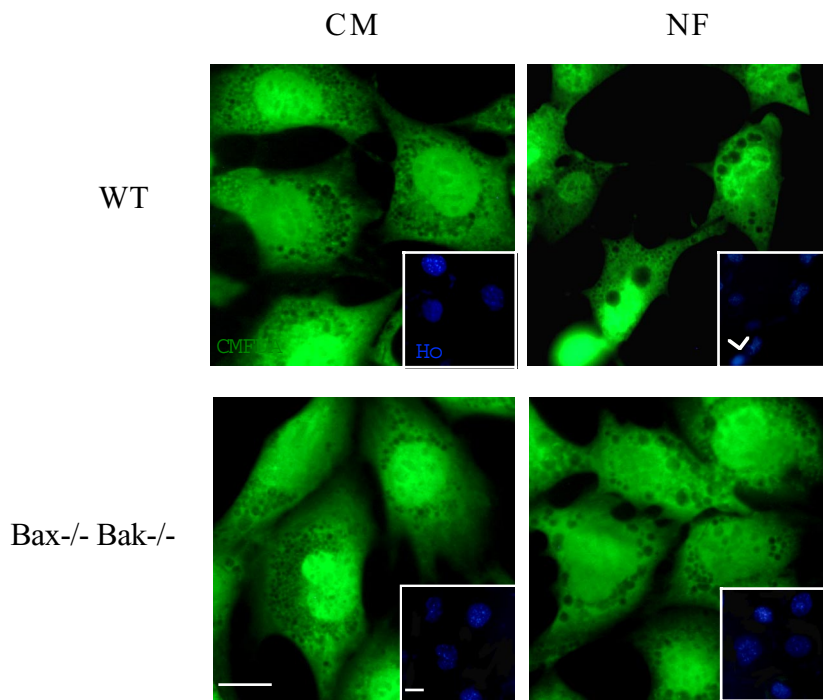

Fig. 2 Supplementary data

**Legend to supplementary Fig. 2:** Autophagic vacuole formation in cells lacking the expression of both Bax and Bak. Wild type mouse embryonic fibroblasts (WT) or Bax/Bak double knock-out (Bax<sup>-/-</sup> Bak<sup>-/-</sup>) fibroblasts were cultured in complete (CM) or nutrient free (NF) medium were cultured for 24 h in the presence of bafilomycin A1, which causes vacuolization of the cytoplasm, as visualized by staining with CMFDA (and counterstaining with Hoechst 33342). Note that this figure contains complementary information to Fig. 7C, in which untreated controls are shown.
